# Supplementary material for: A highly stable, selective, and high-performance VOC sensor using a SnS2 nano-lotus structure
Source: Royal Society of Chemistry journal article supplement (doi:10.1039/d1tc00615k), 2021-01-01
Supplement: d1tc00615k1.pdf [file d1tc00615k1.pdf]

## Supplementary Information

### **A highly stable, selective, and high-performance VOC sensor using a SnS<sub>2</sub> nano-lotus structure**

Rajneesh Kumar Mishra,<sup>a</sup> Gyu Jin Choi,<sup>a</sup> Yogendra Kumar Mishra,<sup>b</sup> Ajeet Kaushik,<sup>c</sup> Youngku Sohn,<sup>d</sup> Seung Hee Lee,<sup>\*e</sup> Jin Seog Gwag<sup>\*a</sup>

<sup>a</sup>Department of Physics, Yeungnam University, Gyeongsan, Gyeongbuk, 38541, South Korea.

<sup>b</sup>Mads Clausen Institute, NanoSYD, University of Southern Denmark, Alsion 2, 6400, Sønderborg, Denmark.

<sup>c</sup>NanoBioTech Laboratory, Department of Natural Sciences, Division of Sciences, Arts & Mathematics, Florida Polytechnic University, Lakeland, FL, 33805-8531, United States.

<sup>d</sup>Department of Chemistry, Chungnam National University, Daejeon, 34134, South Korea.

<sup>e</sup>Information Display/Energy Laboratory, Department of Nanoconvergence Engineering and Department of Polymer Nano-Science and Technology, Jeonbuk (Chonbuk) National University, Jeonju, Jeonbuk 54896, South Korea.

\*Corresponding authors.

E-mail addresses: lsh1@jbnu.ac.kr (S. H. Lee); sweat3000@ynu.ac.kr (J. S. Gwag).

---

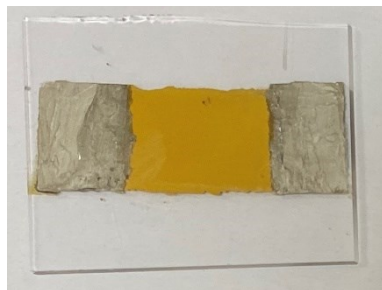

Fig. S1: Optical image of SnS<sub>2</sub> NLS gas sensor.

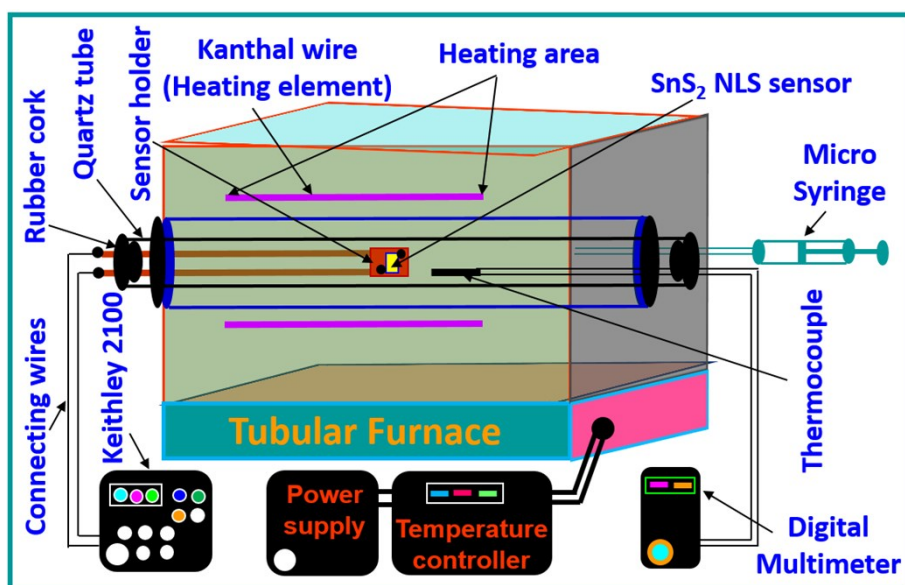

Fig. S2: Schematic view of gas sensing experimental setup.

The volume ( $V_{VOCs}$ ) of liquid VOCs ( $\mu L$ ) are calculated at a particular operating temperature and concentration (ppm) by using the following Eq. S1,<sup>1</sup>

$$V_{VOCs} (\mu L) = \frac{M_{VOCs} C_{ppm} PV}{\rho_{VOCs} RT} \quad (S1)$$

where  $M_{VOCs}$ ,  $C_{ppm}$ ,  $P$ ,  $V$ ,  $\rho_{VOCs}$ ,  $R$ , and  $T$  are the molar mass, VOCs concentration, pressure, test chamber volume, the density of VOCs, the universal gas constant, and operating temperature, respectively.

The lattice spacing corresponding to an individual lattice of SnS<sub>2</sub> nano-lotus system (NLS) was calculated using Bragg's diffraction formula as discussed in Eq. S2,<sup>2,3</sup>

$$2d \sin \theta = n\lambda \quad (S2)$$

where  $d$  is lattice spacing (interplanar spacing),  $\theta$  is Bragg's diffraction angle,  $n$  ( $= 1$ ),  $\lambda$  is the wavelength of X-ray diffraction (here, Cu  $k_{\alpha} = 1.54056 \text{ \AA}$ ).

The lattice strain ( $\varepsilon$ ) of SnS<sub>2</sub> NLS were evaluated using Eq. S3 (Tangent formula), respectively.<sup>2,3</sup>

$$\varepsilon = \frac{\beta}{4 \tan \theta} \quad (S3)$$

where  $\beta$  and  $\theta$  are the lattice spacing, X-ray wavelength, full width at the half maximum of the diffraction peaks, and Bragg's diffraction angle.

**Table S1:** Analysis of XRD results of the SnS<sub>2</sub> nano-lotus structure (NLS).

| XRD analysis using experimental results |                |                               |                                  |                               | Lattice parameters using Rietveld refinement       | JCPDS data 23-0677               |                                                    |
|-----------------------------------------|----------------|-------------------------------|----------------------------------|-------------------------------|----------------------------------------------------|----------------------------------|----------------------------------------------------|
| S. No.                                  | 2 $\theta$ (°) | Lattice planes ( <i>hkl</i> ) | Lattice spacing ( <i>d</i> , nm) | Lattice strain ( $\epsilon$ ) |                                                    | Lattice spacing ( <i>d</i> , nm) | Lattice parameters                                 |
| 1                                       | 15.0405        | (001)                         | 0.5885                           | 0.0127                        | a (= b) = 3.6438 Å<br>c = 5.9038 Å<br>c/a = 1.6202 | 0.5890                           | a (= b) = 3.6486 Å<br>c = 5.8992 Å<br>c/a = 1.6168 |
| 2                                       | 28.3177        | (100)                         | 0.3148                           | 0.0037                        |                                                    | 0.3162                           |                                                    |
| 3                                       | 32.2069        | (101)                         | 0.2777                           | 0.0058                        |                                                    | 0.2784                           |                                                    |
| 4                                       | 41.9489        | (102)                         | 0.2151                           | 0.0061                        |                                                    | 0.2155                           |                                                    |
| 5                                       | 50.0970        | (110)                         | 0.1819                           | 0.0031                        |                                                    | 0.1824                           |                                                    |
| 6                                       | 52.5956        | (111)                         | 0.1738                           | 0.0041                        |                                                    | 0.1743                           |                                                    |
| 7                                       | 55.0366        | (103)                         | 0.1667                           | 0.0048                        |                                                    | 0.1669                           |                                                    |
| 8                                       | 60.7859        | (201)                         | 0.1522                           | 0.0037                        |                                                    | 0.1526                           |                                                    |

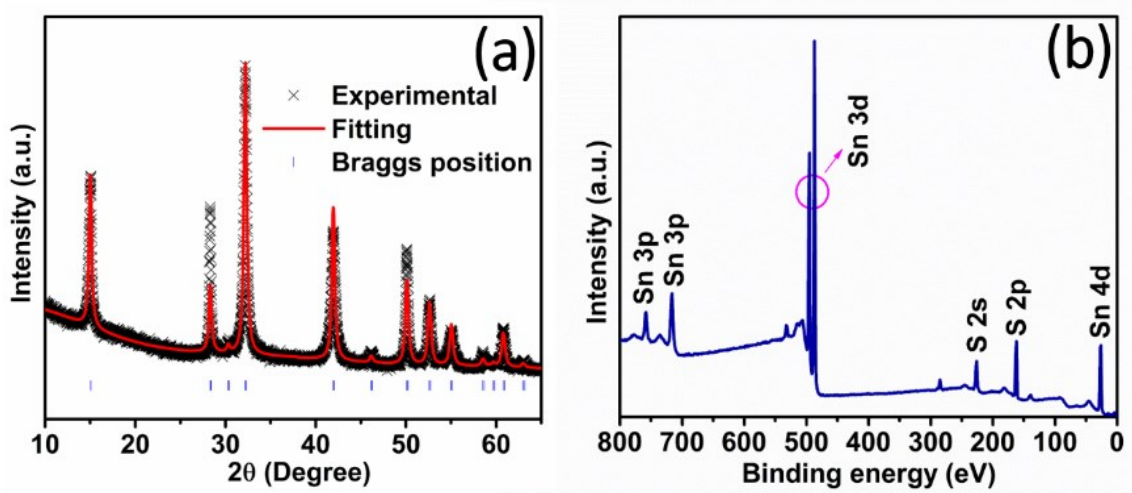

Fig. S3: (a) Rietveld refinement of XRD spectrum; and XPS survey spectrum of the SnS<sub>2</sub> NLS.

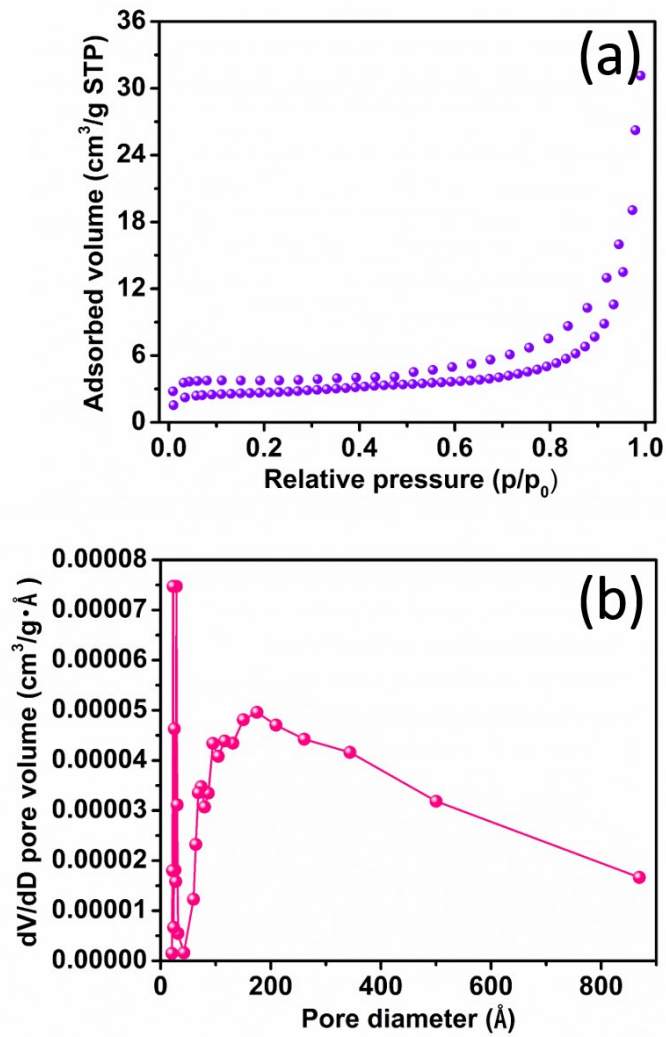

Fig. S4: (a) BET adsorbed volume vs.  $p/p_0$  plot, (b) BJH  $dV/dD$  pore volume vs. pore diameter plot of SnS<sub>2</sub> NLS.

**Table S2:** BET surface area, BJH pore size, and volume analysis of SnS<sub>2</sub> NLS sensor.

|                             | BET surface area          | BJH pore size | BJH pore volume           |
|-----------------------------|---------------------------|---------------|---------------------------|
| lotus-like SnS <sub>2</sub> | 10.2304 m <sup>2</sup> /g | Adsorption    | Adsorption                |
|                             |                           | 32.3905 nm    | 0.0459 cm <sup>3</sup> /g |

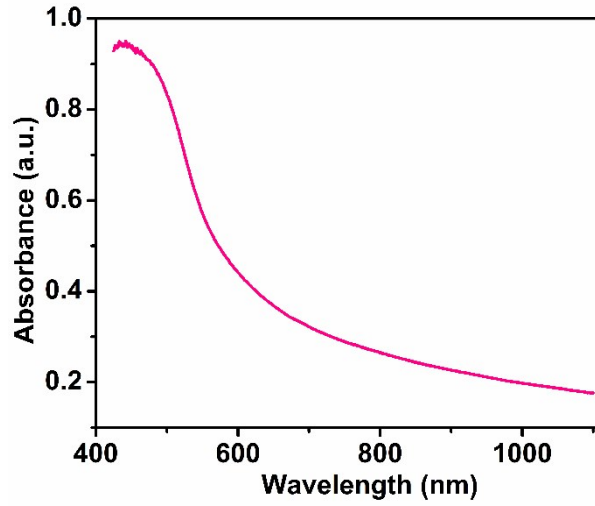

Fig. S5: UV-visible absorbance spectrum of SnS<sub>2</sub> NLS.

For the evaluation of energy bandgap by diffuse reflectance spectroscopy (DRS), the Kubelka-Munk equation is written in Eq. S4,<sup>4,5</sup>

$$\frac{K}{S} = \frac{(1 - R)}{2R} = F(R) \quad (\text{S4})$$

where  $S$ ,  $K$ , and  $R$  are the scatterings, absorption coefficients, and reflectance, respectively, and  $F(R)$  is the Kubelka-Munk function. The optical bandgap and absorption coefficient  $\alpha$  of a direct bandgap SnS<sub>2</sub> NLS are evaluated using the following Eq. S5,<sup>4,5</sup>

$$\alpha h\nu = C_1(h\nu - E_g)^{1/2} \quad (\text{S5})$$

where  $\alpha$ ,  $h\nu$ ,  $C_1$ , and  $E_g$  are the linear absorption coefficient of the material, photon energy, a proportionality constant, and optical bandgap, respectively.

The Kubelka-Munk absorption coefficient  $S$  is constant with wavelength when lotus-like  $\text{SnS}_2$  diffusely scatters light and using the Eq. S5, we obtain the expression as written in Eq. S6,<sup>4,5</sup>

$$[F(R)h\nu]^2 = C_2(h\nu - E_g) \quad (\text{S6})$$

Thus, by using Eq. S4 & S6, we can easily calculate the optical bandgap of  $\text{SnS}_2$  NLS.

The Urbach energy is evaluated by using the following Eq. S7,<sup>1,6</sup>

$$\alpha = \alpha_o \exp\left(\frac{E}{E_U}\right) \quad (\text{S7})$$

By using the Eq. S4 and Eq. S7, we can deduce the following relation Eq. S8,

$$F(R) = F(R)_o \exp\left(\frac{E}{E_U}\right) \quad (\text{S8})$$

Therefore, we can easily estimate the Urbach energy of  $\text{SnS}_2$  NLS using Eq. S8.



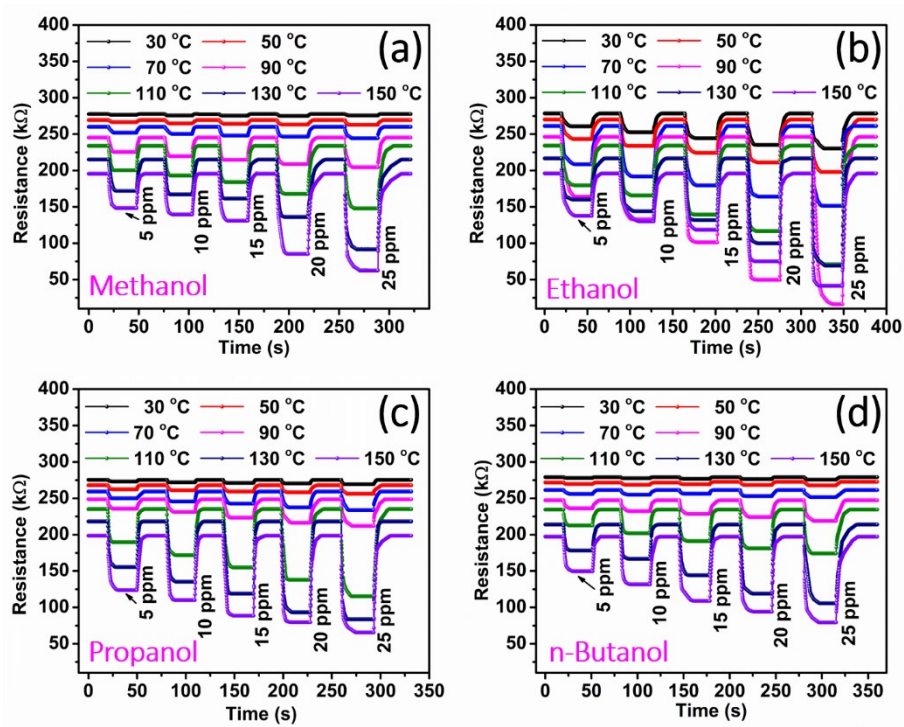

Fig. S6: (a-d) Dynamic gas sensing the resistance of SnS<sub>2</sub> NLS sensor to detect VOCs for various concentrations at different operating temperatures.

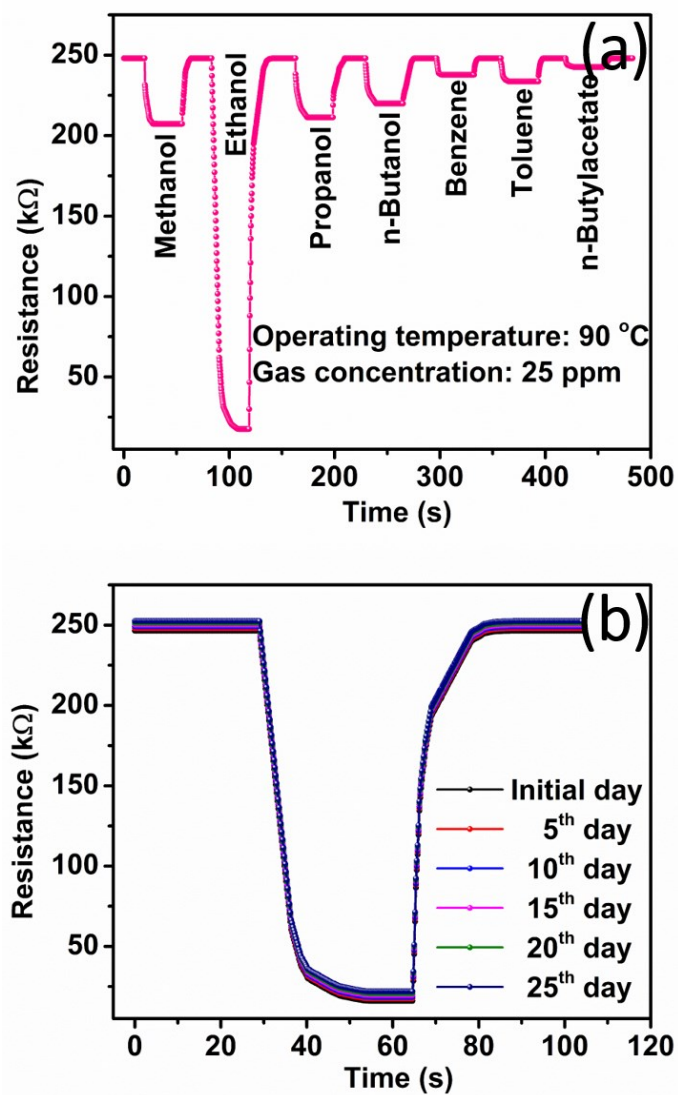

Fig. S7: Gas sensing resistance characteristics of SnS<sub>2</sub> NLS sensor; (a) selectivity for 25 ppm under various interfering gas at an operating temperature of 90 °C, and (b) stability test cycles for 25 ppm of ethanol concentration at 90 °C.

The selectivity coefficient of the SnS<sub>2</sub> NLS sensor was estimated by using the following Eq.

S9;<sup>7</sup>

$$S_c = \frac{S_{ethanol}}{S_{interfering\ gas}} \quad (S9)$$

where  $S_c$  and  $S_{interfering\ gas}$  are the sensitivities of SnS<sub>2</sub> NLS sensor to ethanol and other interfering gas, respectively, as listed in Table S3.

**Table S3:** Analysis of the selectivity coefficient of SnS<sub>2</sub> NLS sensor for 25 ppm concentration at an optimum operating temperature of 90 °C.

| Sensing Element                                  | Interfering gas with 25 ppm concentration |          |           |         |         |                |
|--------------------------------------------------|-------------------------------------------|----------|-----------|---------|---------|----------------|
|                                                  | Methanol                                  | Propanol | n-Butanol | Benzene | Toluene | n-Butylacetate |
| lotus-like SnS <sub>2</sub> based ethanol sensor | 5.7                                       | 6.3      | 8.1       | 22.7    | 16.0    | 42.2           |

## References

- [1] S. B. Upadhyay, R. K. Mishra and P. P. Sahay, Enhanced acetone response in co-precipitated WO<sub>3</sub> nanostructures upon indium doping, *Sens. Actuators, B*, 2015, 209, 368-376.
- [2] B. D. Cullity, *Elements of X-ray Diffraction*, Addison-Wesley, New York, 1978.
- [3] H. P. Klug and L. E. Alexander, *X-ray Diffraction Procedures for Polycrystalline and Amorphous Materials*, Wiley, New York, 1974.
- [4] C. Wu, D. Guo, P. Li, S. Wang, A. Liu and F. Wu, A study on the effects of mixed organic cations on the structure and properties in lead halide perovskites, *Phys. Chem. Chem. Phys.*, 2020, **22**, 3105-3111.
- [5] J. Torrent and V. Barron, Diffuse Reflectance Spectroscopy of Iron Oxides, *Encycl. Surf. Colloid Sci.*, 2002, 1438-1446.
- [6] P. Chetri and A. Choudhury, Investigation of optical properties of SnO<sub>2</sub> nanoparticles, *Physica E*, 2013, **47**, 257-263.
- [7] M. Siemons and U. Simon, Gas sensing properties of volume-doped CoTiO<sub>3</sub> synthesized via polyol method, *Sens. Actuators, B*, 2007, **126**, 595-603.
